# Supplementary material for: Age- and sex-specific differences in immune responses to BNT162b2 COVID-19 and live-attenuated influenza vaccines in UK adolescents
Source: Front Immunol. 2023 Oct 6;14:1248630. doi: 10.3389/fimmu.2023.1248630 (PMC10627794; doi:10.3389/fimmu.2023.1248630)
Supplement: Supplementary Table 2 — Full author list for PITCH Consortium. [file Table_2.xlsx]

## Sheet: OPTIC & PITCH PI list
First Name	Middle Name(s)/Initial(s)	Last Name	Department (if appropriate)	Institution	Email	Collaborative Group/Consortium			Include in future lists
Eleanor		Barnes	Nuffield Department of Medicine	University of Oxford	ellie.barnes@ndm.ox.ac.uk	PITCH Consortium
Sagida		Bibi	Oxford Vaccine Group, Department of Paediatrics	University of Oxford	sagida.bibi@paediatrics.ox.ac.uk	PITCH Consortium
Miles		Carroll	Nuffield Department of Medicine	University of Oxford	miles.carroll@ndm.ox.ac.uk	PITCH Consortium
Christopher	P.	Conlon	Nuffield Department of Medicine	University of Oxford	chris.conlon@ndm.ox.ac.uk	PITCH Consortium			remove
Thushan	I.	de Silva	Department of Infection, Immunity and Cardiovascular Disease	University of Sheffield	t.desilva@sheffield.ac.uk	PITCH Consortium
Alexandra	S	Deeks	Nuffield Department of Medicine	University of Oxford	alexandra.deeks@ndm.ox.ac.uk	PITCH Consortium
Susan	L	Dobson	Institute of Infection, Veterinary and Ecological Sciences	University of Liverpool	s.dobson@liverpool.ac.uk	PITCH Consortium
Christina		Dold	Oxford Vaccine Group, Department of Paediatrics	University of Oxford	christina.dold@paediatrics.ox.ac.uk	PITCH Consortium
Susanna		Dunachie	Nuffield Department of Medicine	University of Oxford	susie.dunachie@ndm.ox.ac.uk	PITCH Consortium
Christopher	JA	Duncan	Translational and Clinical Research Institute	Newcastle University	christopher.duncan@newcastle.ac.uk	PITCH Consortium
Sian		Faustini	Institute for Immunology and Immunotherapy, College of Medical and Dental Science	University of Birmingham	s.e.faustini@bham.ac.uk	PITCH Consortium
Sarah		Foulkes		UK Health Security Agency	sarah.foulkes@ukhsa.gov.uk	PITCH Consortium
John		Frater	Nuffield Department of Medicine	University of Oxford	john.frater@ndm.ox.ac.uk	PITCH Consortium
Victoria		Hall		UK Health Security Agency	Victoria.Hall@ukhsa.gov.uk	PITCH Consortium
Susan		Hopkins		UK Health Security Agency	susan.hopkins@ukhsa.gov.uk	PITCH Consortium
Jasmin		Islam		UK Health Security Agency	jasmin.islam@ukhsa.gov.uk	PITCH Consortium
Katie		Jeffery	Radcliffe Department of Medicine	University of Oxford	katie.jeffery@ouh.nhs.uk	PITCH Consortium
Paul		Klenerman	Nuffield Department of Medicine	University of Oxford	paul.klenerman@medawar.ox.ac.uk	PITCH Consortium
Barbara		Kronsteiner	Nuffield Department of Medicine	University of Oxford	barbara.kronsteiner-dobramysl@ndm.ox.ac.uk	PITCH Consortium
Teresa		Lambe	Oxford Vaccine Group, Department of Paediatrics	University of Oxford	teresa.lambe@paediatrics.ox.ac.uk	PITCH Consortium
Stephanie		Longet	Nuffield Department of Medicine	University of Oxford	stephanie.longet@well.ox.ac.uk	PITCH Consortium
Alexander	J.	Mentzer	Nuffield Department of Medicine	University of Oxford	alexander.mentzer@ndm.ox.ac.uk	PITCH Consortium
Shona	C	Moore	Institute of Infection, Veterinary and Ecological Sciences	University of Liverpool	shona.moore@liverpool.ac.uk	PITCH Consortium
on behalf of the		on behalf of the PITCH Consortium+		Multiple	pitchstudy@ndm.ox.ac.uk
Ashley		Otter		UK Health Security Agency	Ashley.Otter@ukhsa.gov.uk	PITCH Consortium
Rebecca	P.	Payne	Translational and Clinical Research Institute	Newcastle University	rebecca.payne2@newcastle.ac.uk	PITCH Consortium		1
Alex Richter		Richter	Institute for Immunology and Immunotherapy, College of Medical and Dental Science	University of Birmingham	a.g.richter@bham.ac.uk	PITCH Consortium		1
Sarah	L.	Rowland-Jones	Department of Infection, Immunity and Cardiovascular Disease	University of Sheffield	sarah.rowland-jones@ndm.ox.ac.uk	PITCH Consortium			1
Donal		Skelly	Nuffield Department of Clinical Neurosciences	University of Oxford	donal.skelly@ndcn.ox.ac.uk	PITCH Consortium		1	1
Lizzie		Stafford	Nuffield Department of Medicine	University of Oxford	lizzie.stafford1@nhs.net	PITCH Consortium		1
James	E.D.	Thaventhiran	MRC Toxicology Unit	University of Cambridge	jedt2@mrc-tox.cam.ac.uk	PITCH Consortium		1
Lance		Turtle	Institute of Infection, Veterinary and Ecological Sciences	University of Liverpool	lance.turtle@liverpool.ac.uk	PITCH Consortium		1
Daniel	G.	Wootton	Institute of Infection, Veterinary and Ecological Sciences	University of Liverpool	d.g.wootton@liverpool.ac.uk	PITCH Consortium		1	1
